# Supplementary material for: Self-assembled metal-oxo clusters for sensitive and low-powered ultraviolet photodetectors
Source: Royal Society of Chemistry journal article supplement (doi:10.1039/d4ta00333k), 2024-01-01
Supplement: d4ta00333k1.pdf [file d4ta00333k1.pdf]

Supporting information:

**Self-assembled metal-oxo clusters for sensitive and low-powered  
ultraviolet photodetectors**

Manh Hoang Tran, Thi My Huyen Nguyen, Chung Wung Bark\*

Department of Electrical Engineering, Gachon University, 1342 Seongnam-daero,  
Sujeong-gu, Seongnam-si, Gyeonggi-do 13120, South Korea.

\*Corresponding author. E-mail: bark@gachon.ac.kr

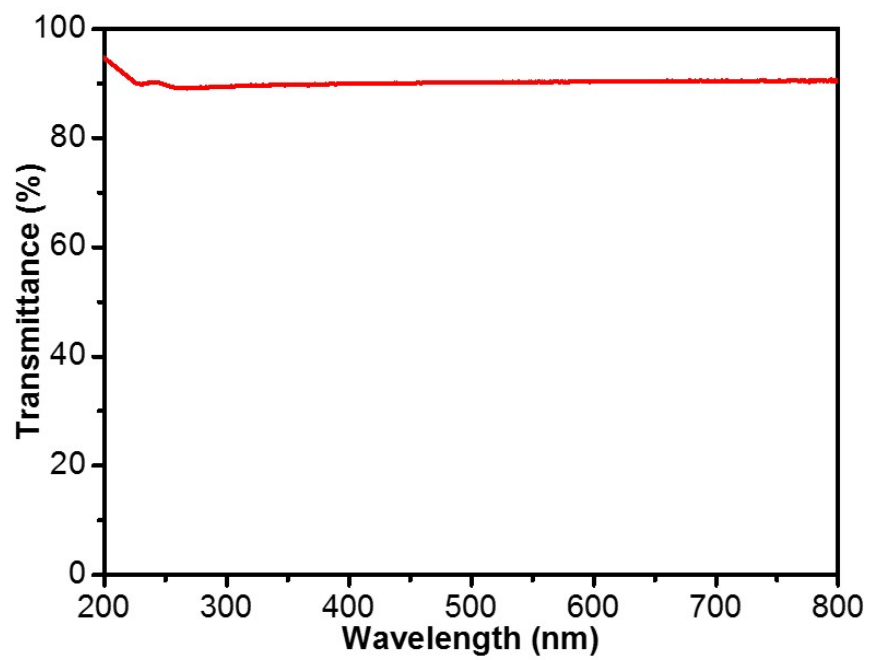

**Figure S1.** UV-Vis spectrum of PEI thin film-coated quartz.

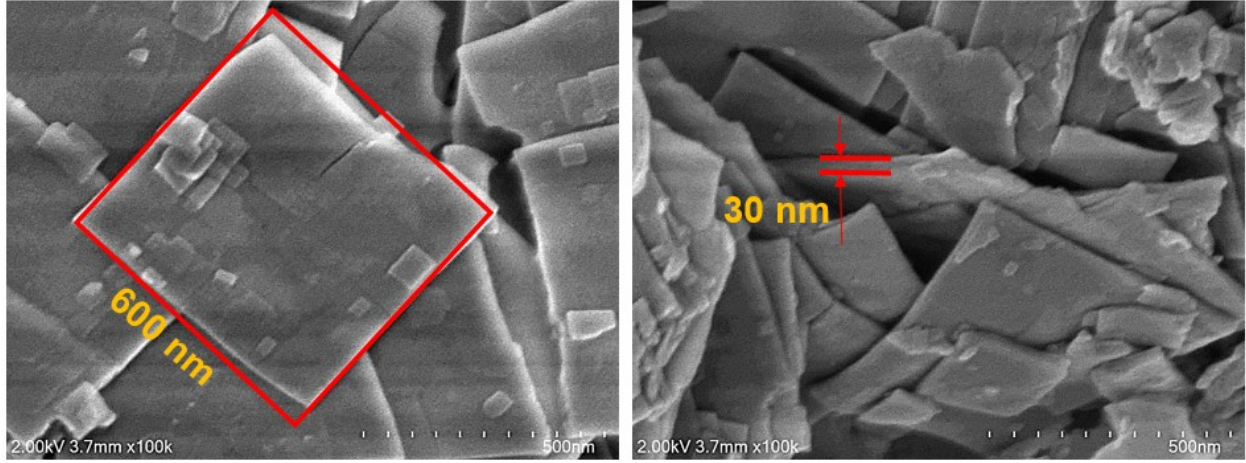

**Figure S2.** Dimension and thickness of ZOC flake determined from SEM image.

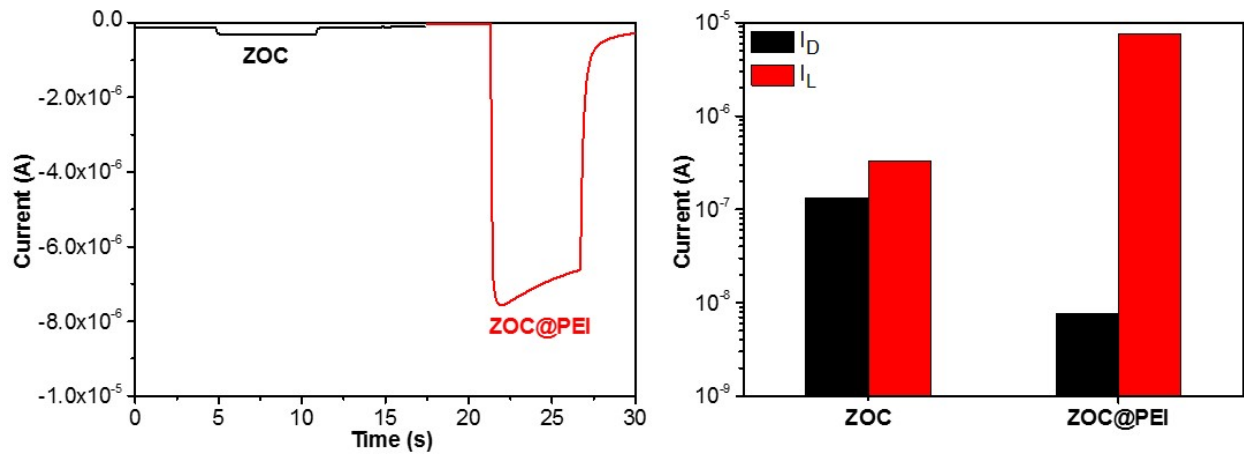

**Figure S3.** Photoresponses, dark current ( $I_D$ ) and current-in-light ( $I_L$ ) of ZOC and ZOC@PEI devices at 0 V under 254-nm UV light (power intensity of  $445 \mu\text{W}$ ).

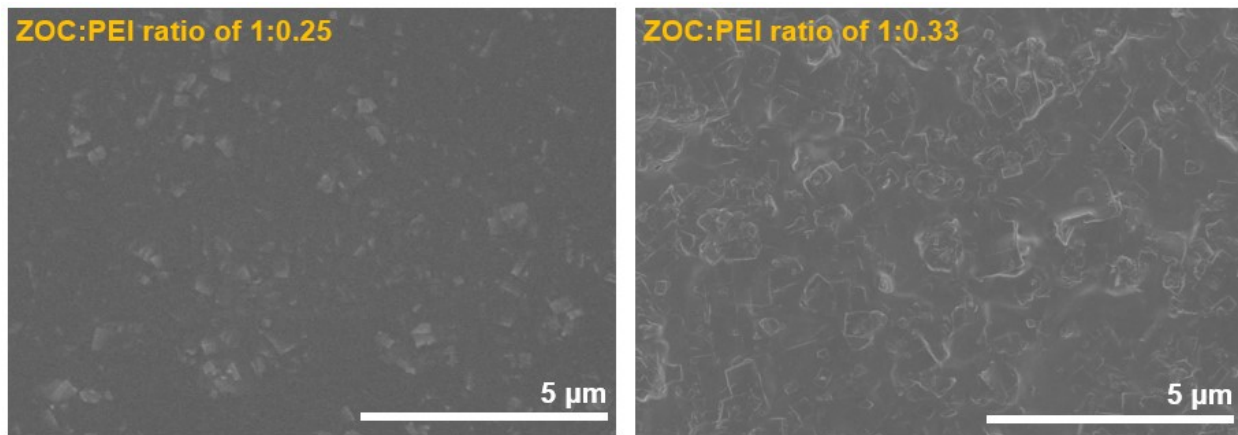

**Figure S4.** SEM images of ZOC@PEI films (at ZOC:PEI ratios of 1:0.25 and 1:0.33).
